# Supplementary material for: Animal health as a function of farmer personality and attitude: using the HEXACO model of personality structure to predict farm-level seropositivity for Fasciola hepatica and Ostertagia ostertagi in dairy cows
Source: Frontiers journal article supplement (doi:10.3389/fvets.2024.1434612), 2024-10-02

## *Supplementary Material*

### Supplementary 1 Surveilled factors and answer options

|                         | Variable                                                           | Variable<br>labelling             | Answer options                                                               |
|-------------------------|--------------------------------------------------------------------|-----------------------------------|------------------------------------------------------------------------------|
| Farm<br>characteristics | Housing system <sup>a</sup>                                        |                                   | Cubicle pen<br><br>Tie stall<br><br>other                                    |
|                         | Pasture                                                            | Pasture access<br><br>present     | Access to pasture<br><br>No Access to pasture                                |
|                         | Farming type                                                       | Farming type                      | Conventional farming<br><br>organic farming                                  |
|                         | Herd size                                                          | Herd size                         | Number of cows                                                               |
|                         | Lameness                                                           | Lameness                          | Prevalence of lame cows                                                      |
|                         | Income Type                                                        | Income                            | Dairy farming as main income<br><br>Dairy farming as supplementary<br>income |
|                         | Visiting year                                                      | Year                              | Year of farm visit                                                           |
| Stockman's<br>attitude  | I am satisfied with the<br>health of my animals.                   | Satisfaction<br><br>animal health | 1 Disagree<br><br>2 Neutral<br><br>3 Agree                                   |
|                         | I feel overwhelmed by the<br>daily work of dairy cow<br>husbandry. | Pressure                          | 1 Strongly Disagree<br><br>2 Disagree<br><br>3 Neutral                       |

|                              |                 |                     |
|------------------------------|-----------------|---------------------|
|                              |                 | 4 Agree             |
|                              |                 | 5 Strongly Agree    |
| I can imagine establishing   | Emotional       | 1 Strongly Disagree |
| an emotional relationship    | relationship    | 2 Disagree          |
| with a cow.                  |                 | 3 Neutral           |
|                              |                 | 4 Agree             |
|                              |                 | 5 Strongly Agree    |
| I regularly attend           | Continuing      | 1 Strongly Disagree |
| professional events of       | education       | 2 Disagree          |
| continuing education.        |                 | 3 Neutral           |
|                              |                 | 4 Agree             |
|                              |                 | 5 Strongly Agree    |
| Dealing with cows is easy    | Animal handling | 1 Strongly Disagree |
| for me.                      |                 | 2 Disagree          |
|                              |                 | 3 Neutral           |
|                              |                 | 4 Agree             |
|                              |                 | 5 Strongly Agree    |
| I accept economic losses in  | Care of Male    | 1 Strongly Disagree |
| order to ensure adequate     | calves          | 2 Disagree          |
| care for bull calves.        |                 | 3 Neutral           |
|                              |                 | 4 Agree             |
|                              |                 | 5 Strongly Agree    |
| It is important for me to be | Patience        | 1 Strongly Disagree |
| patient with my cows.        |                 | 2 Disagree          |
|                              |                 | 3 Neutral           |

|                   |                                                                                      |                         |                          |
|-------------------|--------------------------------------------------------------------------------------|-------------------------|--------------------------|
|                   |                                                                                      |                         | 4 Agree                  |
|                   |                                                                                      |                         | 5 Strongly Agree         |
|                   | It affects me to see a cow in pain.                                                  | Pain                    | 1 Strongly Disagree      |
|                   |                                                                                      |                         | 2 Disagree               |
|                   |                                                                                      |                         | 3 Neutral                |
|                   |                                                                                      |                         | 4 Agree                  |
|                   |                                                                                      |                         | 5 Strongly Agree         |
|                   | On our farm, we often discuss what we could improve about the way we keep dairy cows | Discussions improvement | 1 Strongly Disagree      |
|                   |                                                                                      |                         | 2 Disagree               |
|                   |                                                                                      |                         | 3 Neutral                |
|                   |                                                                                      |                         | 4 Agree                  |
|                   |                                                                                      |                         | 5 Strongly Agree         |
| Calving practices | I look at the cow's facial expression and eyes.                                      | Facial expression       | 1 At every calving       |
|                   |                                                                                      |                         | 2 At conspicuous calving |
|                   |                                                                                      |                         | 3 Never/rarely           |
|                   | I observe the general behavior of the cow.                                           | Observation behaviour   | 1 At every calving       |
|                   |                                                                                      |                         | 2 At conspicuous calving |
|                   |                                                                                      |                         | 3 Never/rarely           |

<sup>a</sup> for descriptive statistics only and excluded from modelling process

**Supplementary 2** HEXACO-domains with Facets and Common Defining Adjectives

| HEXACO-domain             | Facet                  | Common Defining Adjectives   |                              |
|---------------------------|------------------------|------------------------------|------------------------------|
| Emotionality              | Fearfulness            | emotional, oversensitive,    | brave, tough, independent,   |
|                           | Anxiety                | sentimental, fearful,        | self-assured, stable         |
|                           | Dependence             | anxious, vulnerable          |                              |
|                           | Sentimentality         |                              |                              |
| Extraversion              | Social self-esteem     | outgoing, lively,            | shy, passive, withdrawn,     |
|                           | Social boldness        | extraverted, sociable,       | introverted, quiet, reserved |
|                           | Sociability            | talkative, cheerful, active  |                              |
|                           | Liveliness             |                              |                              |
| Agreeableness             | Forgivingness          | patient, tolerant, peaceful, | ill-tempered, quarrelsome,   |
|                           | Gentleness             | mild, agreeable, lenient,    | stubborn, choleric           |
|                           | Flexibility            | gentle                       |                              |
|                           | Patience               |                              |                              |
| conscientiousness         | Organization           | organized, disciplined,      | sloppy, negligent, reckless, |
|                           | Diligence              | diligent, careful,           | lazy, irresponsible, absent- |
|                           | Perfectionism          | thorough, precise            | minded                       |
|                           | Prudence               |                              |                              |
| Openness to<br>experience | Aesthetic appreciation | intellectual, creative,      | shallow, unimaginative,      |
|                           | Inquisitiveness        | unconventional,              | conventional                 |
|                           | Creativity             | innovative, ironic           |                              |
|                           | Unconventionality      |                              |                              |

**Supplementary 3** HEXACO questionnaire. Answer options are “Strongly agree”, “agree”, “neutral”, “disagree”, “strongly disagree” for all statements.

| HEXACO-factor          | Statement according to (44)                        | Facet                     |
|------------------------|----------------------------------------------------|---------------------------|
| Openness to experience | I can look at a painting for a long time.          | Aesthetic<br>Appreciation |
| Conscientiousness      | I make sure things are in the right spot.          | Organization              |
| Agreeableness          | I remain unfriendly to someone who was mean to me. | Forgivingness             |
| Extraversion           | Nobody likes talking with me.                      | Social Self-Esteem        |
| Emotionality           | I am afraid of feeling pain.                       | Fearfulness               |
| Openness to experience | I think science is boring.                         | Inquisitiveness           |
| Conscientiousness      | I postpone difficult tasks as long as possible.    | Diligence                 |
| Agreeableness          | I often express criticism.                         | Gentleness                |
| Extraversion           | I easily approach strangers.                       | Sociability               |
| Emotionality           | I worry less than others.                          | Anxiety                   |
| Openness to experience | I have a lot of imagination.                       | Creativity                |
| Conscientiousness      | I work very precisely.                             | Perfectionism             |
| Agreeableness          | I tend to quickly agree with others.               | Flexibility               |
| Extraversion           | I like to talk with others.                        | Social Boldness           |
| Emotionality           | I can easily overcome difficulties on my own.      | Dependence                |
| Openness to experience | I like people with strange ideas.                  | Unconventionality         |
| Conscientiousness      | I often do things without really thinking.         | Prudence                  |
| Agreeableness          | Even when I’m treated badly, I remain calm.        | Patience                  |
| Extraversion           | I am seldom cheerful.                              | Liveliness                |
| Emotionality           | I have to cry during sad or romantic movies.       | Sentimentality            |

**Supplementary 4** Farm characteristics and stockman's attitude

|                       | Predictor                  | Categories           | n <sub>farms</sub> (%)                | n <sub>cows</sub> (%) |
|-----------------------|----------------------------|----------------------|---------------------------------------|-----------------------|
| Farm characteristics  | Housing system             | Tie stall            | 55 (28.5)                             | 1,306 (14.9)          |
|                       |                            | Cubicle pen          | 138 (71.5)                            | 7468 (85.1)           |
|                       | Pasture access present     | Access               | 68 (35.2)                             | 2283(26.0)            |
|                       |                            | No access            | 125 (64.8)                            | 6,491 (74.0)          |
|                       | Farming type               | Conventional         | 160 (82.9)                            | 7,699 (87.7)          |
|                       |                            | Organic              | 33 (17.1)                             | 1,075 (12.3)          |
|                       | Herd size                  | numeric value        | 45 ± 31; 5 (min) – 231 (max)          |                       |
|                       | Lameness                   | numeric value        | 25% ± 14.0%; 3.3% (min) – 86.6% (max) |                       |
|                       | Income                     | Main income          | 157 (81.3)                            | 8,029 (91.5)          |
|                       |                            | Supplementary income | 36 (18.7)                             | 745 (8.5)             |
|                       | Year                       | 2016                 | 1 (0.5)                               | 25 (0.3)              |
|                       |                            | 2017                 | 78 (40.4)                             | 4,322 (49.3)          |
|                       |                            | 2018                 | 74 (38.3)                             | 3,182 (36.2)          |
|                       |                            | 2019                 | 40 (20.7)                             | 1,245 (14.2)          |
| BTM – antibody status | <i>F. hepatica</i>         | Seropositive         | 47 (24.4)                             | 7,294 (83.1)          |
|                       |                            | Seronegative         | 146 (75.6)                            | 1,480 (16.9)          |
|                       | <i>O. ostertagi</i>        | Seropositive         | 77 (39.9)                             | 3,065 (34.9)          |
|                       |                            | Seronegative         | 116 (60.1)                            | 5,709 (65.1)          |
| Stockman's attitude   | Satisfaction animal health | 1                    | 24 (12.4)                             | 1,241 (14.1)          |
|                       |                            | 2                    | 36 (18.7)                             | 1,527 (17.4)          |
|                       |                            | 3                    | 133 (68.9)                            | 6,006 (68.5)          |

|                  |                            |   |            |              |
|------------------|----------------------------|---|------------|--------------|
|                  | Pressure                   | 1 | 96 (49.7)  | 4,032 (46.0) |
|                  |                            | 2 | 48 (24.9)  | 2,236 (25.5) |
|                  |                            | 3 | 49 (25.4)  | 2,506 (28.5) |
|                  | Emotional relationship     | 1 | 23 (11.9)  | 1,354 (15.4) |
|                  |                            | 2 | 20 (10.4)  | 1,015 (11.6) |
|                  |                            | 3 | 150 (77.7) | 6,405 (73.0) |
|                  | Continuing education       | 1 | 17 (8.8)   | 610 (6.9)    |
|                  |                            | 2 | 24 (12.4)  | 850 (9.7)    |
|                  |                            | 3 | 152 (78.8) | 7,314 (83.4) |
|                  | Animal handling            | 1 | 7 (3.6)    | 283 (3.2)    |
|                  |                            | 2 | 13 (6.7)   | 664 (7.6)    |
|                  |                            | 3 | 173 (89.7) | 7,827 (89.2) |
|                  | Care of male calves        | 1 | 2 (1.0)    | 296 (3.4)    |
|                  |                            | 2 | 0 (0.0)    | 0 (0.0)      |
|                  |                            | 3 | 191 (99.0) | 8,478 (96.6) |
|                  | Patience                   | 1 | 2 (1.0)    | 41 (0.5)     |
|                  |                            | 2 | 11 (5.7)   | 870 (9.9)    |
|                  |                            | 3 | 180 (93.3) | 7,863 (89.6) |
|                  | Pain                       | 1 | 2 (1.0)    | 44 (0.5)     |
|                  |                            | 2 | 3 (1.6)    | 115 (1.3)    |
|                  |                            | 3 | 188 (97.4) | 8,615 (98.2) |
|                  | Discussions<br>improvement | 1 | 10 (5.2)   | 292 (3.3)    |
|                  |                            | 2 | 13 (6.7)   | 453 (5.2)    |
|                  |                            | 3 | 170 (88.1) | 8,029 (91.5) |
| Calving practice | Facial expression          | 1 | 75 (38.9)  | 3,627 (41.3) |

|                      |   |            |              |
|----------------------|---|------------|--------------|
|                      | 2 | 40 (20.7)  | 1,753 (20.0) |
|                      | 3 | 78 (40.4)  | 3,394 (38.7) |
| Observation behavior | 1 | 183 (94.8) | 7,976 (90.9) |
|                      | 2 | 9 (4.7)    | 737 (8.4)    |
|                      | 3 | 1 (0.5)    | 61 (0.7)     |



**Supplementary 5** Results of the HEXACO questionnaire

| HEXACO-factor | Item according to (44)                        | Answer option | n <sub>farms</sub> (%) | n <sub>cows</sub> (%) |
|---------------|-----------------------------------------------|---------------|------------------------|-----------------------|
| Emotionality  | I am afraid of feeling pain.                  | 1             | 27 (14.0)              | 1,105 (12.7)          |
|               |                                               | 2             | 51 (26.4)              | 2,630 (29.9)          |
|               |                                               | 3             | 41 (21.2)              | 1,834 (20.9)          |
|               |                                               | 4             | 59 (30.6)              | 2,651 (30.1)          |
|               |                                               | 5             | 15 (7.8)               | 554 (6.4)             |
|               | I worry less than others.                     | 1             | 15 (7.8)               | 880 (10.0)            |
|               |                                               | 2             | 49 (25.4)              | 1,959 (22.4)          |
|               |                                               | 3             | 59 (30.6)              | 2,562 (29.1)          |
|               |                                               | 4             | 54 (28.0)              | 2,663 (30.4)          |
|               |                                               | 5             | 16 (8.3)               | 710 (8.1)             |
|               | I can easily overcome difficulties on my own. | 1             | 19 (9.8)               | 1,067 (12.2)          |
|               |                                               | 2             | 92 (47.7)              | 4,012 (45.6)          |
|               |                                               | 3             | 63 (32.6)              | 2,892 (32.9)          |
|               |                                               | 4             | 17 (.8)                | 762 (8.8)             |
|               |                                               | 5             | 2 (1.0)                | 41 (0.5)              |
|               | I have to cry during sad or romantic movies.  | 1             | 33 (17.1)              | 1,586 (18.1)          |
|               |                                               | 2             | 39 (20.2)              | 1,738 (19.90)         |
|               |                                               | 3             | 55 (28.5)              | 2,440 (27.7)          |
|               |                                               | 4             | 48 (24.9)              | 2,304 (26.2)          |
|               |                                               | 5             | 18 (9.3)               | 706 (8.1)             |
| Extraversion  | Nobody likes talking with me.                 | 1             | 0 (0.0)                | 0 (0.0)               |
|               |                                               | 2             | 1 (0.5)                | 95 (1.1)              |
|               |                                               | 3             | 23 (11.9)              | 918 (10.5)            |

|               |                                                          |   |            |              |
|---------------|----------------------------------------------------------|---|------------|--------------|
| Agreeableness | I easily approach strangers.                             | 4 | 87 (45.1)  | 4,158 (47.3) |
|               |                                                          | 5 | 82 (42.5)  | 3603 (41.1)  |
|               |                                                          | 1 | 3 (1.6)    | 266 (3.0)    |
|               |                                                          | 2 | 31 (16.1)  | 1,525 (17.4) |
|               |                                                          | 3 | 54 (28.0)  | 2,378 (27.1) |
|               | I like to talk with others.                              | 4 | 77(39.9)   | 3,401 (38.7) |
|               |                                                          | 5 | 28 (14.5)  | 1,204 (13.8) |
|               |                                                          | 1 | 1 (0.5)    | 30 (0.4)     |
|               |                                                          | 2 | 6 (3.1)    | 1192 (2.2)   |
|               |                                                          | 3 | 33 (17.1)  | 1,689 (19.3) |
|               | I am seldom cheerful.                                    | 4 | 113 (58.5) | 5,295 (60.3) |
|               |                                                          | 5 | 40 (20.7)  | 1,568 (17.8) |
|               |                                                          | 1 | 8 (4.1)    | 472 (5.5)    |
|               |                                                          | 2 | 50 (25.9)  | 2,299 (26.1) |
|               |                                                          | 3 | 61 (31.6)  | 2,371 (27.1) |
|               | I remain unfriendly to<br>someone who was mean to<br>me. | 4 | 63 (32.7)  | 3,014 (34.3) |
|               |                                                          | 5 | 11 (5.7)   | 618 (7.0)    |
|               |                                                          | 1 | 12 (6.2)   | 675 (7.8)    |
|               |                                                          | 2 | 47 (24.4)  | 2,139 (24.3) |
|               |                                                          | 3 | 81 (42.0)  | 3,648 (41.5) |
|               | I often express criticism.                               | 4 | 43 (22.2)  | 1,974 (22.5) |
|               |                                                          | 5 | 10 (5.2)   | 338 (3.9)    |
|               |                                                          | 1 | 11 (5.7)   | 534 (6.2)    |
|               |                                                          | 2 | 53 (27.5)  | 2,372 (27.0) |
|               |                                                          | 3 | 79 (40.9)  | 3,361 (38.3) |

|                   |                               |   |            |              |
|-------------------|-------------------------------|---|------------|--------------|
|                   |                               | 4 | 44 (22.8)  | 2,164 (24.6) |
|                   |                               | 5 | 6 (3.1)    | 343 (3.9)    |
|                   | I tend to quickly agree with  | 1 | 2 (1.0)    | 128 (1.5)    |
|                   | others.                       | 2 | 35 (18.2)  | 1,511 (17.2) |
|                   |                               | 3 | 100 (51.8) | 4,673(53.1)  |
|                   |                               | 4 | 52 (26.9)  | 2,316 (26.3) |
|                   |                               | 5 | 4 (2.1)    | 146 (1.7)    |
|                   | Even when I'm treated badly,  | 1 | 11 (5.7)   | 639 (7.3)    |
|                   | I remain calm.                | 2 | 46 (23.8)  | 2,051 (23.3) |
|                   |                               | 3 | 55 (28.5)  | 2,546 (28.9) |
|                   |                               | 4 | 69(35.8)   | 2,950 (33.5) |
|                   |                               | 5 | 12 (6.2)   | 588 (6.7)    |
| Conscientiousness | I make sure things are in the | 1 | 0 (0.0)    | 0 (0.0)      |
|                   | right spot.                   | 2 | 15 (7.8)   | 905 (10.3)   |
|                   |                               | 3 | 40 (20.7)  | 1,775 (20.3) |
|                   |                               | 4 | 85 (44.0)  | 3,787 (43.2) |
|                   |                               | 5 | 53 (27.5)  | 2,307 (26.2) |
|                   | I postpone difficult tasks as | 1 | 6 (3.1)    | 203 (2.3)    |
|                   | long as possible.             | 2 | 38 (19.7)  | 1,541 (17.6) |
|                   |                               | 3 | 53 27.5)   | 2,588 (29.5) |
|                   |                               | 4 | 77 (39.9)  | 3,725 (42.3) |
|                   |                               | 5 | 19 (9.8)   | 717 (8.3)    |
|                   | I work very precisely.        | 1 | 1 (0.5)    | 102 (1.2)    |
|                   |                               | 2 | 9 (4.7)    | 584 (6.7)    |
|                   |                               | 3 | 47 (24.4)  | 2,097 (23.9) |

|          |                                |   |           |              |
|----------|--------------------------------|---|-----------|--------------|
| Openness |                                | 4 | 96 (49.7) | 4,435 (50.5) |
|          |                                | 5 | 40 (20.7) | 1,556 (17.7) |
|          | I often do things without      | 1 | 3 (1.6)   | 148 (1.7)    |
|          | really thinking.               | 2 | 15 (7.8)  | 647 (7.5)    |
|          |                                | 3 | 44 (22.8) | 1,916 (21.8) |
|          |                                | 4 | 97 (50.3) | 4397 (50.1)  |
|          |                                | 5 | 34 (17.6) | 1,666 (18.9) |
|          | I can look at a painting for a | 1 | 12 (6.2)  | 615 (7.0)    |
|          | long time.                     | 2 | 53 (27.5) | 2,732 (31.1) |
|          |                                | 3 | 79 (40.9) | 3,272 (37.3) |
|          |                                | 4 | 43 (22.3) | 1,967 (22.4) |
|          |                                | 5 | 6 (3.1)   | 188 (2.1)    |
|          | I think science is boring.     | 1 | 5 (2.6)   | 161 (1.8)    |
|          |                                | 2 | 10 (5.2)  | 428 (4.9)    |
|          |                                | 3 | 38 (19.6) | 1,769 (20.2) |
|          |                                | 4 | 81 (42.0) | 3,695 (42.1) |
|          |                                | 5 | 59 (30.6) | 2,721 (31.0) |
|          | I have a lot of imagination.   | 1 | 1 (0.5)   | 199 (2.3)    |
|          |                                | 2 | 20 (10.4) | 893 (10.2)   |
|          |                                | 3 | 73 (37.8) | 3,191 (36.4) |
|          |                                | 4 | 69 (35.8) | 3034 (34.5)  |
|          |                                | 5 | 30 (15.5) | 1,457 (16.6) |
|          | I like people with strange     | 1 | 9 (4.7)   | 508 (5.8)    |
|          | ideas.                         | 2 | 33 (17.1) | 1,603 (18.2) |
|          |                                | 3 | 81 (42.0) | 3,243 (36.9) |

|   |           |              |
|---|-----------|--------------|
| 4 | 57 (29.5) | 2,914 (33.1) |
| 5 | 13 (6.7)  | 506 (5.8)    |

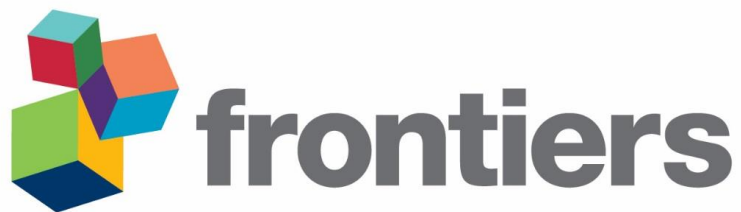

Supplement: Data_Sheet_1.pdf [file Data_Sheet_1.pdf]
